# Supplementary material
Source: Springer Nature journal article supplement (https://www.springermedizin.de/resource/supplementary/12885_2008_1566_MOESM1_ESM.pdf/9472338)
Supplement: MOESM1 [file 9472338]

| IPTG: | Control |   | MKRN1 |   | Control |   | MKRN1 |   |
|-------|---------|---|-------|---|---------|---|-------|---|
|       | -       | + | -     | + | -       | + | -     | + |

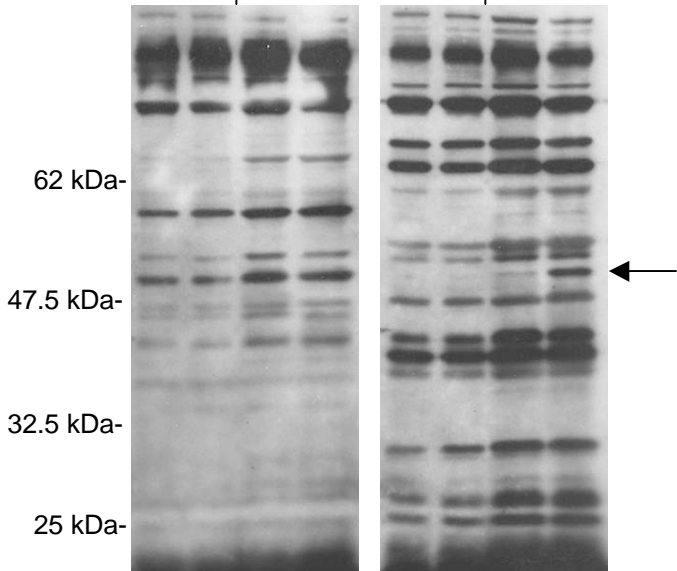

Serum from a healthy donor (#1)

Serum from a patient (#15) with esophageal SCC
